# Supplementary material for: Novel CRISPR-Cas9 BAP1 Knockout Pre-Clinical Tumor Model Recapitulates Human Melanoma Tumorigenesis and Immune Evolution
Source: Research Square preprint supplement (doi:10.21203/rs.3.rs-6134890/v2), 2025-04-15
Supplement: Supplementary file 1 [file 4b4d3e99814d2d1442079830.pdf]

**Supplementary Table 1: Key Gene Mutations Associated with Skin and Uveal Melanomas and Their Representation in Melan-a and B16F10 Cells**

| Gene           | Mutation in human            | Pathway/Role                             | Frequency (%)              | Cancer Type | Ocular melanocyte | Melan-a cells | B16F10 Cells      |
|----------------|------------------------------|------------------------------------------|----------------------------|-------------|-------------------|---------------|-------------------|
| <i>BRAF</i>    | V600E                        | MAPK/ERK pathway                         | ~50% (CM)                  | CM          | Non-mutation      | Non-mutation  | nonsynonymous SNV |
| <i>NRAS</i>    | Q61R, Q61K, G12D             | MAPK/ERK, PI3K/AKT pathways              | ~20% (CM)                  | CM          | Non-mutation      | Non-mutation  | Non-mutation      |
| <i>TP53</i>    | Various loss-of-function     | Tumor suppressor                         | ~19% (CM)                  | CM          | Non-mutation      | Non-mutation  | Non-mutation      |
| <i>CDKN2A</i>  | Deletions, point mutations   | Tumor suppressor (cell cycle regulation) | 10-40% (CM)                | CM          | Non-mutation      | Non-mutation  | Non-mutation      |
| <i>PTEN</i>    | Loss of heterozygosity (LOH) | PI3K/AKT pathway                         | ~5-10% (skin melanoma)     | CM          | Non-mutation      | Non-mutation  | nonsynonymous SNV |
| <i>KIT</i>     | L576P, K642E                 | Receptor tyrosine kinase                 | 2-8% (acral/mucosal types) | CM          | Non-mutation      | Non-mutation  | Non-mutation      |
| <i>TERT</i>    | C228T, C250T (promoter)      | Telomere maintenance                     | ~70-80% (CM)               | CM          | Non-mutation      | Non-mutation  | Non-mutation      |
| <i>MAP2K1</i>  | K57N, P124L                  | MAPK/ERK pathway                         | Rare (~1-2%)               | CM          | Non-mutation      | Non-mutation  | Non-mutation      |
| <i>CTNNB1</i>  | S45F, D32H                   | Wnt signaling                            | Rare                       | CM          | Non-mutation      | Non-mutation  | Non-mutation      |
| <i>RB1</i>     | LOH, point mutations         | Cell cycle regulation                    | Rare                       | CM          | Non-mutation      | Non-mutation  | Non-mutation      |
| <i>GNAQ</i>    | Q209L, Q209P                 | G-protein signaling, MAPK pathway        | ~50% (UM)                  | UM          | Non-mutation      | Non-mutation  | Non-mutation      |
| <i>GNAI1</i>   | Q209L, Q209P                 | G-protein signaling, MAPK pathway        | ~30% (UM)                  | UM          | Non-mutation      | Non-mutation  | Non-mutation      |
| <i>BAP1</i>    | Loss-of-function, deletions  | Chromatin remodeling, tumor suppression  | ~40-50% (UM)               | UM          | Non-mutation      | Non-mutation  | Non-mutation      |
| <i>SF3B1</i>   | R625H, R625C                 | Spliceosome machinery                    | ~20% (UM)                  | UM          | Non-mutation      | nonsynonymous | Non-mutation      |
| <i>EIF1AX</i>  | P2S, A113V                   | Translation initiation                   | ~10-15% (UM)               | UM          | Non-mutation      | Non-mutation  | Non-mutation      |
| <i>CYSLTR2</i> | L129Q                        | GPCR signaling                           | ~5-10% (UM)                | UM          | Non-mutation      | Non-mutation  | Non-mutation      |
| <i>PLCB4</i>   | D630Y                        | G-protein signaling                      | ~5% (UM)                   | UM          | Non-mutation      | Non-mutation  | Non-mutation      |
| <i>TERT</i>    | C228T, C250T (promoter)      | Telomere maintenance                     | Rare (~5%)                 | UM          | Non-mutation      | Non-mutation  | Non-mutation      |
| <i>RB1</i>     | LOH, point mutations         | Cell cycle regulation                    | Rare                       | UM          | Non-mutation      | Non-mutation  | Non-mutation      |
| <i>PTEN</i>    | Loss, rarely mutated         | PI3K/AKT pathway                         | Rare (metastatic cases)    | UM          | Non-mutation      | Non-mutation  | nonsynonymous SNV |
